# Supplementary material for: Human papillomavirus-16 infection and p16 expression in oral squamous cell carcinoma
Source: PubMed Central journal article supplement — Oncol Lett. 2021 May 14;22(1):528. doi: 10.3892/ol.2021.12789 (PMC8138897; doi:10.3892/ol.2021.12789), 2021-05-14

Figure S1. Association between p16 protein expression and survival of patients with oral squamous cell carcinoma. (A) DFS was not associated with p16 protein expression ( $P=0.9485$ ). (B) OS was also not significantly associated ( $P=0.9732$ ). DFS, disease-free survival; OS, overall survival.

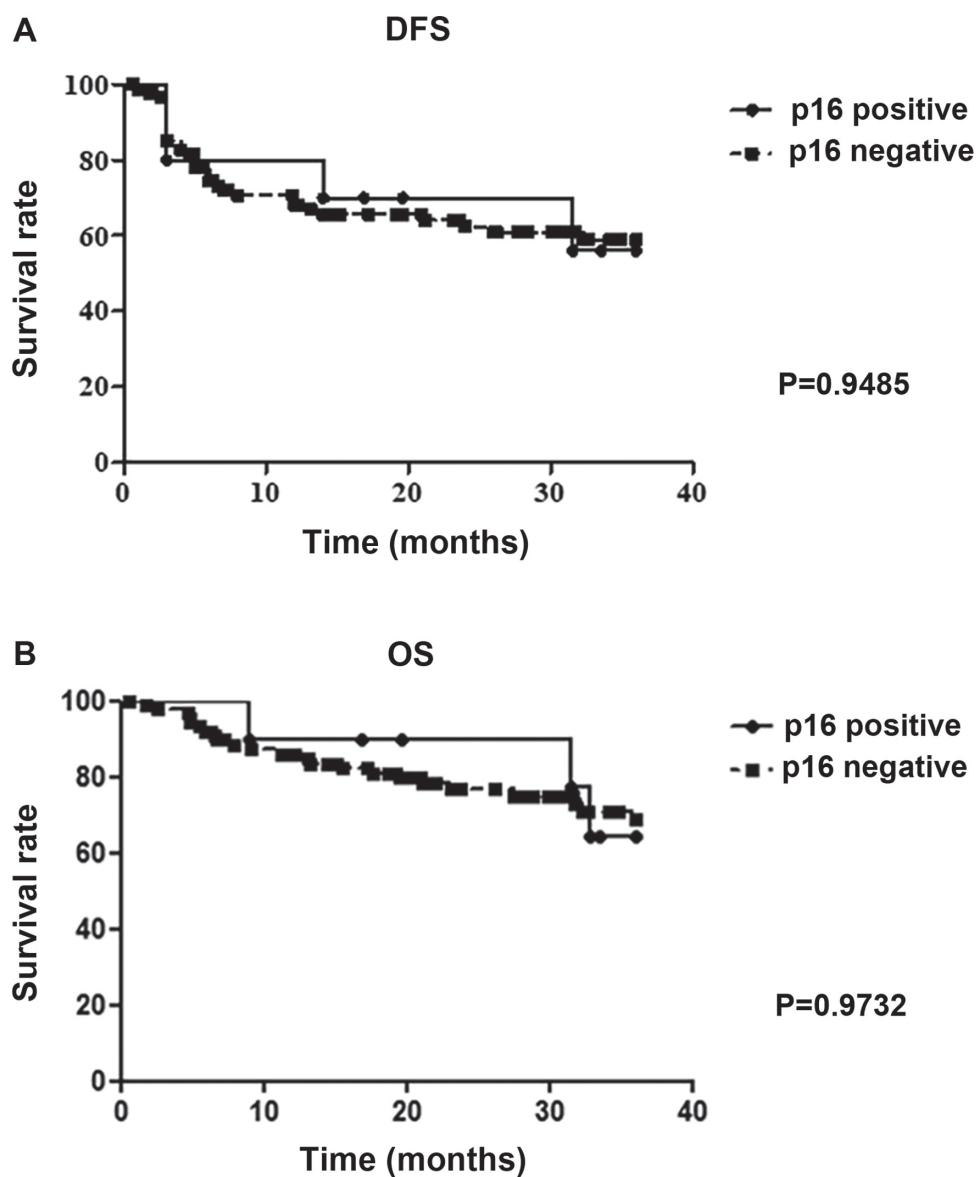

Figure S2. Detection of HPV-16E6 DNA in oral squamous cell carcinoma cases that were p16-positive. (A) HPV-16E6 DNA was positive in 3 out of 10 cases. (B) ExoV-resistant HPV-16E6 DNA was positive in only 1 case expressing E6 mRNA. ExoV, exonuclease V; OSCC, oral squamous cell carcinoma; HPV, human papillomavirus; -, without digestion; +, with digestion.

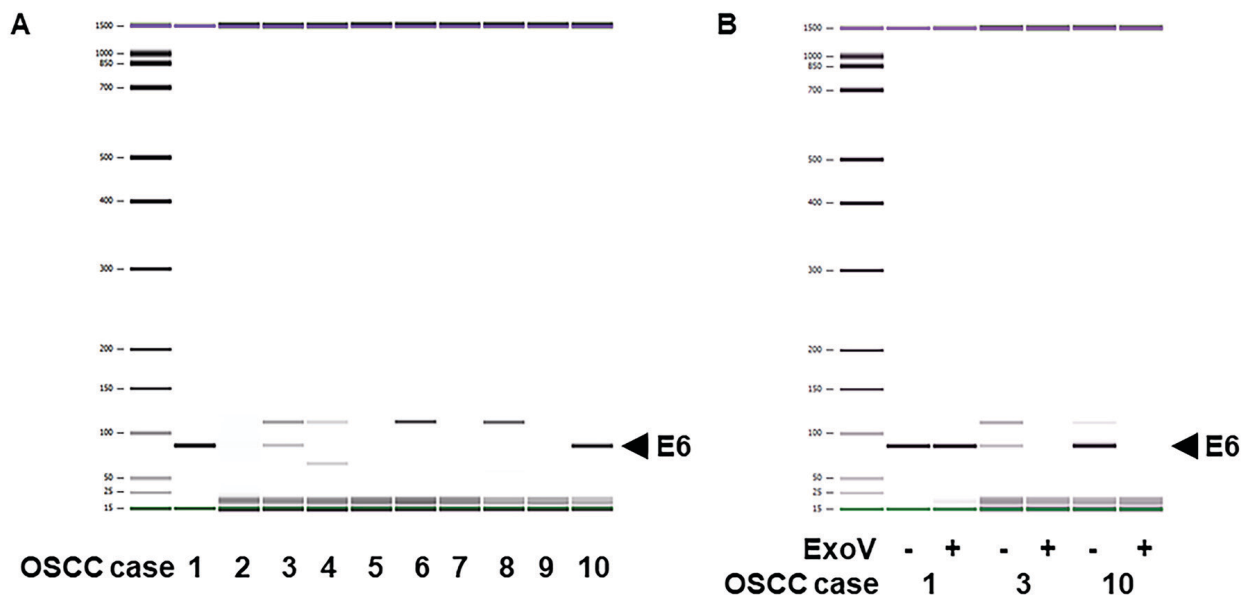

Supplement: Supplementary_Data.pdf [file Supplementary_Data.pdf]
